# Supplementary material for: The impact of the COVID-19 pandemic on Polish orthopedics, in particular on the level of stress among orthopedic surgeons and the education process
Source: PubMed Central journal article supplement (PMC8462693; doi:10.1371/journal.pone.0257289), 2021-09-24
Supplement: pone.0257289.s002.pdf [file pone.0257289.s002.pdf]

# The impact of the COVID-19 Pandemic on Polish Orthopedics

This is an anonymous survey to analyze the impact of the COVID-19 pandemic on specialist's work, trainee program stress level, and overwork. It contains 4 parts and will take about 10-15 minutes.

Thank you for your time and help!

I am aware that participation in the survey is voluntary and anonymous and I agree to participate in the survey by going to the next part of the survey

**\* Required**

In this section we would like to know basic information about you.

1. 1) What is your gender? \*

*Mark only one oval.*

Female

Male

2. 2) What is your age? \*

*Mark only one oval.*

< 35 years old

35-49 years old

50-69 years old

> 70 years old

3. 3) How long have you been practicing as an orthopedic surgeon \*

*Mark only one oval.*

- 0-5 years  
 6-10 years  
 11-20 years  
 >20 years

4. 4) What position do you currently occupy in your main workplace? \*

*Mark only one oval.*

- Resident physician  
 Specialist  
 Head of hospital ward  
 Private practise  
 Other

5. 5) Main field of interests: (more than 1 answer is possible) \*

*Check all that apply.*

- General orthopedics  
 Traumatology  
 Musculoskeletal oncology  
 Joints arthroplasty  
 Arthroscopy and minimal invasive orthopedics  
 Spine surgery  
 Pediatric orthopedics  
 Hand surgery  
 Foot surgery  
 Others

6. 6) In which kind of institution do you work currently? \*

*Mark only one oval.*

- University Hospital
- County hospital
- Private medical practice
- Other

How the COVID-19 pandemic affect work in private practice/clinic/ward?

7. 7) My department/ my clinic/ I am currently involved in the treatment of COVID-19 positive patients. \*

*Mark only one oval.*

|                       | 1                     | 2                     | 3                     | 4                     | 5                     |               |
|-----------------------|-----------------------|-----------------------|-----------------------|-----------------------|-----------------------|---------------|
| I completely disagree | <input type="radio"/> | <input type="radio"/> | <input type="radio"/> | <input type="radio"/> | <input type="radio"/> | I fully agree |

8. 8) My office / my clinic / I have performed protection measures and a change in work organization to prevent the spread of COVID-19. \*

*Mark only one oval.*

|                       | 1                     | 2                     | 3                     | 4                     | 5                     |               |
|-----------------------|-----------------------|-----------------------|-----------------------|-----------------------|-----------------------|---------------|
| I completely disagree | <input type="radio"/> | <input type="radio"/> | <input type="radio"/> | <input type="radio"/> | <input type="radio"/> | I fully agree |

9. 9) On my ward, the staff has been divided into smaller groups to minimize the risk of contamination. \*

*Mark only one oval.*

|                       | 1                     | 2                     | 3                     | 4                     | 5                     |               |
|-----------------------|-----------------------|-----------------------|-----------------------|-----------------------|-----------------------|---------------|
| I completely disagree | <input type="radio"/> | <input type="radio"/> | <input type="radio"/> | <input type="radio"/> | <input type="radio"/> | I fully agree |

10. 10) ) On my ward, both healthy and infected patients were isolated in separate rooms. \*

Mark only one oval.

|                       | 1                     | 2                     | 3                     | 4                     | 5                     |               |
|-----------------------|-----------------------|-----------------------|-----------------------|-----------------------|-----------------------|---------------|
| I completely disagree | <input type="radio"/> | <input type="radio"/> | <input type="radio"/> | <input type="radio"/> | <input type="radio"/> | I fully agree |

11. 11) The performance of virtual visit or remote work was used by me/ my colleagues during the COVID-19 pandemic. \*

Mark only one oval.

|                       | 1                     | 2                     | 3                     | 4                     | 5                     |               |
|-----------------------|-----------------------|-----------------------|-----------------------|-----------------------|-----------------------|---------------|
| I completely disagree | <input type="radio"/> | <input type="radio"/> | <input type="radio"/> | <input type="radio"/> | <input type="radio"/> | I fully agree |

12. 12) I believe that virtual visit should be used much more frequently in the future. \*

Mark only one oval.

|                       | 1                     | 2                     | 3                     | 4                     | 5                     |               |
|-----------------------|-----------------------|-----------------------|-----------------------|-----------------------|-----------------------|---------------|
| I completely disagree | <input type="radio"/> | <input type="radio"/> | <input type="radio"/> | <input type="radio"/> | <input type="radio"/> | I fully agree |

13. 13) There was a staff shortage in my facility as a result of quarantine or infections due to the COVID-19 outbreak. \*

Mark only one oval.

|                       | 1                     | 2                     | 3                     | 4                     | 5                     |               |
|-----------------------|-----------------------|-----------------------|-----------------------|-----------------------|-----------------------|---------------|
| I completely disagree | <input type="radio"/> | <input type="radio"/> | <input type="radio"/> | <input type="radio"/> | <input type="radio"/> | I fully agree |

14. 14) Due to the COVID-19 pandemic, medical staff was ordered to shorten working hours, reduce overtime hours or take forced leave. \*

Mark only one oval.

|                       |                       |                       |                       |                       |                       |               |
|-----------------------|-----------------------|-----------------------|-----------------------|-----------------------|-----------------------|---------------|
|                       | 1                     | 2                     | 3                     | 4                     | 5                     |               |
| I completely disagree | <input type="radio"/> | <input type="radio"/> | <input type="radio"/> | <input type="radio"/> | <input type="radio"/> | I fully agree |

15. 15) I/ my office/ my facility received a sufficient amount of personal protective equipment (disinfectants, aprons, gloves, FFP2/ FFP3 masks) and I believe that me and my colleagues were adequately protected at work during the COVID-19 epidemic. \*

Mark only one oval.

|                       |                       |                       |                       |                       |                       |               |
|-----------------------|-----------------------|-----------------------|-----------------------|-----------------------|-----------------------|---------------|
|                       | 1                     | 2                     | 3                     | 4                     | 5                     |               |
| I completely disagree | <input type="radio"/> | <input type="radio"/> | <input type="radio"/> | <input type="radio"/> | <input type="radio"/> | I fully agree |

Which sentence listed below are true about your training course? ONLY FOR RESIDENT PHYSICIANS

16. 16) The COVID-19 pandemic reduced the number of operations I performed.

Mark only one oval.

|                       |                       |                       |                       |                       |                       |               |
|-----------------------|-----------------------|-----------------------|-----------------------|-----------------------|-----------------------|---------------|
|                       | 1                     | 2                     | 3                     | 4                     | 5                     |               |
| I completely disagree | <input type="radio"/> | <input type="radio"/> | <input type="radio"/> | <input type="radio"/> | <input type="radio"/> | I fully agree |

17. 17) The COVID-19 pandemic has had a negative impact on the quality of education of resident physician.

Mark only one oval.

|                       |                       |                       |                       |                       |                       |               |
|-----------------------|-----------------------|-----------------------|-----------------------|-----------------------|-----------------------|---------------|
|                       | 1                     | 2                     | 3                     | 4                     | 5                     |               |
| I completely disagree | <input type="radio"/> | <input type="radio"/> | <input type="radio"/> | <input type="radio"/> | <input type="radio"/> | I fully agree |

18. 18) The COVID-19 pandemic has increased my responsibility while working in the ward.

*Mark only one oval.*

|                       |                       |                       |                       |                       |                       |               |
|-----------------------|-----------------------|-----------------------|-----------------------|-----------------------|-----------------------|---------------|
|                       | 1                     | 2                     | 3                     | 4                     | 5                     |               |
| I completely disagree | <input type="radio"/> | <input type="radio"/> | <input type="radio"/> | <input type="radio"/> | <input type="radio"/> | I fully agree |

19. 19) The COVID-19 pandemic has extended my responsibilities as a specialist/resident physician.

*Mark only one oval.*

|                       |                       |                       |                       |                       |                       |               |
|-----------------------|-----------------------|-----------------------|-----------------------|-----------------------|-----------------------|---------------|
|                       | 1                     | 2                     | 3                     | 4                     | 5                     |               |
| I completely disagree | <input type="radio"/> | <input type="radio"/> | <input type="radio"/> | <input type="radio"/> | <input type="radio"/> | I fully agree |

20. 20) The COVID-19 pandemic had a negative impact on the result/quality of preparation for the National Specialization Examination (PES).

*Mark only one oval.*

|                       |                       |                       |                       |                       |                       |               |
|-----------------------|-----------------------|-----------------------|-----------------------|-----------------------|-----------------------|---------------|
|                       | 1                     | 2                     | 3                     | 4                     | 5                     |               |
| I completely disagree | <input type="radio"/> | <input type="radio"/> | <input type="radio"/> | <input type="radio"/> | <input type="radio"/> | I fully agree |

21. 21) The COVID-19 pandemic has adversely affected my ability to improve my surgical skills.

*Mark only one oval.*

|                       |                       |                       |                       |                       |                       |               |
|-----------------------|-----------------------|-----------------------|-----------------------|-----------------------|-----------------------|---------------|
|                       | 1                     | 2                     | 3                     | 4                     | 5                     |               |
| I completely disagree | <input type="radio"/> | <input type="radio"/> | <input type="radio"/> | <input type="radio"/> | <input type="radio"/> | I fully agree |

22. 22) The COVID-19 pandemic has reduced the number of conferences I have attended.

*Mark only one oval.*

|                       | 1                     | 2                     | 3                     | 4                     | 5                     |               |
|-----------------------|-----------------------|-----------------------|-----------------------|-----------------------|-----------------------|---------------|
| I completely disagree | <input type="radio"/> | <input type="radio"/> | <input type="radio"/> | <input type="radio"/> | <input type="radio"/> | I fully agree |

23. 23) During the COVID-19 pandemic, I participated in online conferences.

*Mark only one oval.*

|                       | 1                     | 2                     | 3                     | 4                     | 5                     |               |
|-----------------------|-----------------------|-----------------------|-----------------------|-----------------------|-----------------------|---------------|
| I completely disagree | <input type="radio"/> | <input type="radio"/> | <input type="radio"/> | <input type="radio"/> | <input type="radio"/> | I fully agree |

24. 24) I used webinars during the COVID-19 pandemic.

*Mark only one oval.*

|                       | 1                     | 2                     | 3                     | 4                     | 5                     |               |
|-----------------------|-----------------------|-----------------------|-----------------------|-----------------------|-----------------------|---------------|
| I completely disagree | <input type="radio"/> | <input type="radio"/> | <input type="radio"/> | <input type="radio"/> | <input type="radio"/> | I fully agree |

25. 25) My quarantine had a negative impact on the effect of my specialization education (if relevant).

*Mark only one oval.*

|                       | 1                     | 2                     | 3                     | 4                     | 5                     |               |
|-----------------------|-----------------------|-----------------------|-----------------------|-----------------------|-----------------------|---------------|
| I completely disagree | <input type="radio"/> | <input type="radio"/> | <input type="radio"/> | <input type="radio"/> | <input type="radio"/> | I fully agree |

26. 26) I believe that the form of online learning (conferences, webinars) positively influenced the level of my knowledge and this form of transferring knowledge should be used in the future.

Mark only one oval.

|                       |                       |                       |                       |                       |                       |               |
|-----------------------|-----------------------|-----------------------|-----------------------|-----------------------|-----------------------|---------------|
| 1                     | 2                     | 3                     | 4                     | 5                     |                       |               |
| I completely disagree | <input type="radio"/> | <input type="radio"/> | <input type="radio"/> | <input type="radio"/> | <input type="radio"/> | I fully agree |

How COVID-19 pandemic impact on overwork and stress level?

27. 27) I feel safe doing a physical examination of a patient who is tested positive for Sars-COV-2. \*

Mark only one oval.

|                       |                       |                       |                       |                       |                       |               |
|-----------------------|-----------------------|-----------------------|-----------------------|-----------------------|-----------------------|---------------|
| 1                     | 2                     | 3                     | 4                     | 5                     |                       |               |
| I completely disagree | <input type="radio"/> | <input type="radio"/> | <input type="radio"/> | <input type="radio"/> | <input type="radio"/> | I fully agree |

28. 28) In my opinion the use of additional safety measures makes it difficult to work in the ward/ emergency room/ operating theater. \*

Mark only one oval.

|                       |                       |                       |                       |                       |                       |               |
|-----------------------|-----------------------|-----------------------|-----------------------|-----------------------|-----------------------|---------------|
| 1                     | 2                     | 3                     | 4                     | 5                     |                       |               |
| I completely disagree | <input type="radio"/> | <input type="radio"/> | <input type="radio"/> | <input type="radio"/> | <input type="radio"/> | I fully agree |

29. 29) I am afraid of Sars-COV-2 infection in the workplace. \*

Mark only one oval.

|                       |                       |                       |                       |                       |                       |               |
|-----------------------|-----------------------|-----------------------|-----------------------|-----------------------|-----------------------|---------------|
| 1                     | 2                     | 3                     | 4                     | 5                     |                       |               |
| I completely disagree | <input type="radio"/> | <input type="radio"/> | <input type="radio"/> | <input type="radio"/> | <input type="radio"/> | I fully agree |



30. 30) I feel anxious about the increased likelihood of Sars-COV-2 infection of family members. \*

Mark only one oval.

|                       | 1                     | 2                     | 3                     | 4                     | 5                     |               |
|-----------------------|-----------------------|-----------------------|-----------------------|-----------------------|-----------------------|---------------|
| I completely disagree | <input type="radio"/> | <input type="radio"/> | <input type="radio"/> | <input type="radio"/> | <input type="radio"/> | I fully agree |

31. 31) I have more workload during the COVID-19 pandemic than before it began. \*

Mark only one oval.

|                       | 1                     | 2                     | 3                     | 4                     | 5                     |               |
|-----------------------|-----------------------|-----------------------|-----------------------|-----------------------|-----------------------|---------------|
| I completely disagree | <input type="radio"/> | <input type="radio"/> | <input type="radio"/> | <input type="radio"/> | <input type="radio"/> | I fully agree |

32. 32) Due to staff shortages, there was a need to engage more work on duty. \*

Mark only one oval.

|                       | 1                     | 2                     | 3                     | 4                     | 5                     |               |
|-----------------------|-----------------------|-----------------------|-----------------------|-----------------------|-----------------------|---------------|
| I completely disagree | <input type="radio"/> | <input type="radio"/> | <input type="radio"/> | <input type="radio"/> | <input type="radio"/> | I fully agree |

33. 33) The SARS-CoV-2 pandemic negatively affected the atmosphere between doctors in the ward. \*

Mark only one oval.

|                       | 1                     | 2                     | 3                     | 4                     | 5                     |               |
|-----------------------|-----------------------|-----------------------|-----------------------|-----------------------|-----------------------|---------------|
| I completely disagree | <input type="radio"/> | <input type="radio"/> | <input type="radio"/> | <input type="radio"/> | <input type="radio"/> | I fully agree |

The COVID-19 pandemic impact on work on daily basis and patients.

34. 34) In my opinion, the number of patients hospitalized in the Orthopedic and Trauma Ward decreased by: \*

*Mark only one oval.*

- 80-100 %
- 60-80%
- 40-60%
- 20-40%
- 0-20%
- It is hard to say

35. 35) In my opinion, the number of surgeries performed in the Orthopedic and Trauma Ward decreased by: \*

*Mark only one oval.*

- 80-100 %
- 60-80%
- 40-60%
- 20-40%
- 0-20%
- It is hard to say

36. 36) In my opinion, the number of patients requiring immediate orthopedic assistance admitted to ICU decreased by: \*

*Mark only one oval.*

- 80-100 %
- 60-80%
- 40-60%
- 20-40%
- 0-20%
- It is hard to say

37. 37) In my opinion, the number of acute (emergency) surgeries performed in the Orthopedic and Trauma Ward decreased by: \*

*Mark only one oval.*

- 80-100 %
- 60-80%
- 40-60%
- 20-40%
- 0-20%
- It is hard to say

38. 38) Percentage of patients who voluntarily cancel their visit to the ward - estimate: \*

*Mark only one oval.*

- 80-100 %
- 60-80%
- 40-60%
- 20-40%
- 0-20%
- It is hard to say

39. 39) Percentage number of Patients who voluntarily cancel a planned procedure - estimate: \*

*Mark only one oval.*

- 80-100 %
- 60-80%
- 40-60%
- 20-40%
- 0-20%
- It is hard to say

40. 40) Due to the SARS-CoV-2 pandemic, the number of patients in my facility/ ward decreased by: \*

*Mark only one oval.*

- 80-100 %
- 60-80%
- 40-60%
- 20-40%
- 0-20%
- It is hard to say

41. 41) Due to the SARS-CoV-2 pandemic, the number of patients in my private practice decreased by:

*Mark only one oval.*

- 80-100 %
- 60-80%
- 40-60%
- 20-40%
- 0-20%
- It is hard to say

Which sentence about regulations in a fight with COVID-19 pandemic are true?

42. 42) I consider myself well-informed on the latest Covid-19 regulations. \*

*Mark only one oval.*

- 1      2      3      4      5
- 
- I completely disagree      I fully agree
-

43. 43) Clinical practices conducted in Orthopedic and Trauma wards are of high importance in the fight against the SARS-CoV-2 pandemic. \*

Mark only one oval.

|                       | 1                     | 2                     | 3                     | 4                     | 5                     |               |
|-----------------------|-----------------------|-----------------------|-----------------------|-----------------------|-----------------------|---------------|
| I completely disagree | <input type="radio"/> | <input type="radio"/> | <input type="radio"/> | <input type="radio"/> | <input type="radio"/> | I fully agree |

44. 44) The Polish health care system is sufficiently well prepared to fight the SARS-CoV-2 pandemic. \*

Mark only one oval.

|                       | 1                     | 2                     | 3                     | 4                     | 5                     |               |
|-----------------------|-----------------------|-----------------------|-----------------------|-----------------------|-----------------------|---------------|
| I completely disagree | <input type="radio"/> | <input type="radio"/> | <input type="radio"/> | <input type="radio"/> | <input type="radio"/> | I fully agree |

45. 45) The regulations introduced so far are essential in the fight against the SARS-CoV-2 pandemic. \*

Mark only one oval.

|                       | 1                     | 2                     | 3                     | 4                     | 5                     |               |
|-----------------------|-----------------------|-----------------------|-----------------------|-----------------------|-----------------------|---------------|
| I completely disagree | <input type="radio"/> | <input type="radio"/> | <input type="radio"/> | <input type="radio"/> | <input type="radio"/> | I fully agree |

46. 46) The regulations introduced so far are sufficient to fight the SARS-CoV-2 pandemic. \*

Mark only one oval.

|                       | 1                     | 2                     | 3                     | 4                     | 5                     |               |
|-----------------------|-----------------------|-----------------------|-----------------------|-----------------------|-----------------------|---------------|
| I completely disagree | <input type="radio"/> | <input type="radio"/> | <input type="radio"/> | <input type="radio"/> | <input type="radio"/> | I fully agree |

47. 47) How would you rate your stress level at work before March 2020? \*

Mark only one oval.

|                       |                       |                       |                       |                       |                       |                       |                       |                       |                       |
|-----------------------|-----------------------|-----------------------|-----------------------|-----------------------|-----------------------|-----------------------|-----------------------|-----------------------|-----------------------|
| 1                     | 2                     | 3                     | 4                     | 5                     | 6                     | 7                     | 8                     | 9                     | 10                    |
| <input type="radio"/> | <input type="radio"/> | <input type="radio"/> | <input type="radio"/> | <input type="radio"/> | <input type="radio"/> | <input type="radio"/> | <input type="radio"/> | <input type="radio"/> | <input type="radio"/> |

48. 48) How would you rate your stress level at work between March 2020 and December 2020? \*

Mark only one oval.

|                       |                       |                       |                       |                       |                       |                       |                       |                       |                       |
|-----------------------|-----------------------|-----------------------|-----------------------|-----------------------|-----------------------|-----------------------|-----------------------|-----------------------|-----------------------|
| 1                     | 2                     | 3                     | 4                     | 5                     | 6                     | 7                     | 8                     | 9                     | 10                    |
| <input type="radio"/> | <input type="radio"/> | <input type="radio"/> | <input type="radio"/> | <input type="radio"/> | <input type="radio"/> | <input type="radio"/> | <input type="radio"/> | <input type="radio"/> | <input type="radio"/> |

What is your opinion on these prognoses about the future of pandemics?

49. 49) I think that situation on my ward will be back to normal in 2021. \*

Mark only one oval.

|                       |                       |                       |                       |                       |                       |               |
|-----------------------|-----------------------|-----------------------|-----------------------|-----------------------|-----------------------|---------------|
|                       | 1                     | 2                     | 3                     | 4                     | 5                     |               |
| I completely disagree | <input type="radio"/> | <input type="radio"/> | <input type="radio"/> | <input type="radio"/> | <input type="radio"/> | I fully agree |

50. 50) I expect to be transferred in 2021 to perform medical work outside my specialty. (eg. ICU, emergency treatment, etc). \*

Mark only one oval.

|                       |                       |                       |                       |                       |                       |               |
|-----------------------|-----------------------|-----------------------|-----------------------|-----------------------|-----------------------|---------------|
|                       | 1                     | 2                     | 3                     | 4                     | 5                     |               |
| I completely disagree | <input type="radio"/> | <input type="radio"/> | <input type="radio"/> | <input type="radio"/> | <input type="radio"/> | I fully agree |

51. 51) Me/my practise will financially suffer from COVID-19 pandemic.

*Mark only one oval.*

|                       | 1                     | 2                     | 3                     | 4                     | 5                     |               |
|-----------------------|-----------------------|-----------------------|-----------------------|-----------------------|-----------------------|---------------|
| I completely disagree | <input type="radio"/> | <input type="radio"/> | <input type="radio"/> | <input type="radio"/> | <input type="radio"/> | I fully agree |

---

This content is neither created nor endorsed by Google.

Google Forms
